# Supplementary material for: Acceptability and implementation challenges of smartphone-based training of community health nurses for visual inspection with acetic acid in Ghana: mHealth and cervical cancer screening
Source: PubMed Central journal article supplement — BMJ Open. 2019 Jul 16;9(7):e030528. doi: 10.1136/bmjopen-2019-030528 (PMC6661590; doi:10.1136/bmjopen-2019-030528), 2019-07-16
Supplement: bmjopen-2019-030528supp001.pdf [file bmjopen-2019-030528supp001.pdf]

## **Interview Guide**

### **Community Health Nurses**

#### **Perception on training**

1. How did you find your two-week training?
  - *Probes:* What did you learn during the training? How comfortable did you feel providing cervical cancer screening during the training? Was there anything you would have changed about the training? How was the content, how about the format and presentation?

#### **Nurses' attitude, perception and experience regarding screening service**

2. How did your patients feel about receiving the cervical cancer screening?
  - *Probes:* How comfortable do you think your patients were with receiving cervical cancer screening? What, if anything, do you think would have improved their perceptions and expectations of the screening?
3. How did you find the expert support for screening during the 3 month training? What benefits or challenges, if any, did you experience with receiving the expert support?
4. How was screening without expert support? What challenges, if any, did you experience with doing the screenings without expert support? What rewards and benefits did you experience?
5. How feasible do you think it would be to continue cervical cancer screening as part of the CHPS program? What challenges or benefits do you think there would be with continuing the screening?
6. How did you find using smartphones to take photos and send to the experts for review?
  - *Probe:* How comfortable were you using the smart phone to send photos to the expert? How did you find this method of communication? Did you experience any challenges with logistics like with cell phone plans, SIM cards, charging, handling, or finding a signal to send or receive feedback?
7. Since you began providing cervical cancer screening, what challenges have you experienced with providing the screening?
  - *Probes:* Did you experience any logistics challenges? Personal? Resources? How was the support and interaction with the expert etc.?

#### **Recommendations to improve service**

8. What are some ways we can improve your ability to provide screening? Do you have any suggestions to improve the CHPS cervical cancer screening program?
9. What opportunities do you think there are to expand the CHPS program? Are there other types of screening or services that the community needs that are not currently being provided?
10. Is there anything else you would like to share with us today?
